# Supplementary material for: Efficacy and safety of strontium ranelate in the treatment of knee osteoarthritis: results of a double-blind, randomised placebo-controlled trial
Source: PubMed Central journal article supplement — Ann Rheum Dis. 2012 Nov 1;72(2):179–86. doi: 10.1136/annrheumdis-2012-202231 (PMC3599139; doi:10.1136/annrheumdis-2012-202231), 2012-11-01
Supplement: annrheumdis-2012-202231-s1.pdf [file annrheumdis-2012-202231-s1.pdf]

## **Appendix**

### ***Executive Committee***

J-Y Reginster (Chairman), C Cooper (International Coordinator), C Christiansen, P Delmas (deceased July 2008), R Chapurlat (from 2008 onward), H Genant, J Zacher, N Bellamy.

### ***Steering Committee***

C Cooper (International Coordination, Chair), National Coordinators (see below), and representatives from the Central Reading Centres.

### ***Safety Committee***

C Speirs, G Bréart, O Meyer.

### ***Central Reading Centre (Lyon)***

D Gensburger, M Arlot, J-P Roux, R Chapurlat

### ***Central Reading Centre (Liege)***

R Deroisy, O Bruyère, J-Y Reginster.

### ***National Coordinators***

P Sambrook (Australia), B Leeb (Austria), A Verbruggen (Belgium), W Bensen (Canada), T Hala (Czech Republic), M Holm-Bentzen (Denmark), I Valter (Estonia), X Chevalier (France), B Swoboda (Germany), S Adami (Italy), M Kloppenburg (The Netherlands), E Grazuleviciute (Lithuania), J Badurski (Poland), J Branco (Portugal), E Nasonov (Russia), F Navarro (Spain), T Spector (UK).

### ***Investigators***

*Australia:* L Barnsley, S Hall, G Jones, A Klestov, L March, P Nash, E Romas, R Will.  
*Austria:* L Erlacher, FB Leeb, H Resch, F Rainer, O Zamani. *Belgium:* T Appelboom, JP Devogelaer, A Kvasz, F Raeman, A Verbruggen. *Canada:* AD Beaulieu, WG Bensen, J Brown, AA Cividino, F Morin, WP Olszynski, JP Raynauld, JC Thorne. *Czech Republic:* T Hala, K Pavelka. *Denmark:* P Alexandersen, HC Hoeck, M Holm-Bentzen, P Lundqvist.  
*Estonia:* I Valter. *France:* L Aim, P Audouy, P Beaunier, CL Benhamou, F Berenbaum, E Chabaud, D Chalet, X Chevalier, M Cohen-Solal, D Delbecq, L Euller-Ziegler, P Fardellone,

P Hilliquin, E Jacquety, N Jude, D Lechevalier, JC Mouchet, P Richette, E de Sainte Lorette, T Schaeverbeke, A Sebbah, E Vignot. *Germany*: T Brabant, GR Burmester, J Grifka, PEM Müller, B Swoboda, J Zacher. *Italy*: S Adami, G Bianchi, W Grassi, L Di Matteo, V Modena, O Di Munno, S Ortolani, L Punzi, M Zangari. *Lithuania*: E Grazuleviciute. *Netherlands*: M Kloppenburg, LD Roorda, PLCM Van Riel. *Poland*: J Badurski, E Czerwinski, A Gorecki, W Tlustochowicz. *Portugal*: J Branco, J Canas Da Silva, JA Melo Gomes, LM Miranda. *Romania*: F Radulescu. *Russian Federation*: LI Alexeeva, AV Orlov-Morozov, EG Pikhak, VG Pilyaev, NA Shostak, EI Shmidt, NV Zagorodniy. *Spain*: L Arboleya Rodríguez, P Benito Ruiz, E Chamizo Carmona, E Collantes Estévez, G Herrero-Beaumont, E Martín Mola, A Moreno, A Naranjo Hernández, F Navarro Sarabia, JM Padrino, C Palacios, A Rodríguez De La Serna, JA Román Ivorra, A Torrijos. *United Kingdom*: E Abdulkhikim, N Arden, F Birrell, H Donnachie, W Fraser, R Keen, R Sarmiento, MD Stone.
