# Supplementary material for: Efficacy and safety of strontium ranelate in the treatment of knee osteoarthritis: results of a double-blind, randomised placebo-controlled trial
Source: PubMed Central journal article supplement — Ann Rheum Dis. 2012 Nov 1;72(2):179–86. doi: 10.1136/annrheumdis-2012-202231 (PMC3599139; doi:10.1136/annrheumdis-2012-202231), 2012-11-01
Supplement: annrheumdis-2012-202231-s3.pdf [file annrheumdis-2012-202231-s3.pdf]

**Table S2.** Concomitant treatments during the study.

| <b>Pharmacological class or agent</b>                                             | <b>Strontium ranelate<br/>1 g/day (N=558)</b> | <b>Strontium ranelate<br/>2 g/day (N=566)</b> | <b>Placebo<br/>(N=559)</b> |
|-----------------------------------------------------------------------------------|-----------------------------------------------|-----------------------------------------------|----------------------------|
| <b>All</b>                                                                        | <b>430 (77%)</b>                              | <b>424 (75%)</b>                              | <b>424 (76%)</b>           |
| Propionic acid derivatives (e.g., ibuprofen and naproxen)                         | 136 (24%)                                     | 138 (24%)                                     | 140 (25%)                  |
| Acetic acid derivatives and related substances (e.g. diclofenac and indomethacin) | 97 (17%)                                      | 100 (18%)                                     | 105 (19%)                  |
| Anilides (e.g., paracetamol)                                                      | 221 (40%)                                     | 229 (41%)                                     | 202 (36%)                  |
| Opioids                                                                           | 61 (11%)                                      | 63 (11%)                                      | 59 (11%)                   |
| Topical products for joint and muscular pain                                      | 51 (9%)                                       | 42 (7%)                                       | 56 (10%)                   |
| COX-2 inhibitors (e.g., celecoxib and lumiracoxib)                                | 49 (9%)                                       | 58 (10%)                                      | 33 (6%)                    |
| Oxicams (e.g., meloxicam and prxicam)                                             | 50 (9%)                                       | 51 (9%)                                       | 54 (10%)                   |
| Corticosteroids (systemic use) for OA                                             | 30 (5%)                                       | 36 (6%)                                       | 26 (5%)                    |
| Salicylic acid and derivatives                                                    | 14 (3%)                                       | 13 (2%)                                       | 11 (2%)                    |
| Glucosamine                                                                       | 3 (0.5%)                                      | 7 (1%)                                        | 3 (0.5%)                   |
| Chondroitin sulphate                                                              | 2 (0.4%)                                      | 0                                             | 1 (0.2%)                   |
| Glucosamine/chondroitin sulphate combination                                      | 0                                             | 1 (0.2%)                                      | 1 (0.2%)                   |
